# Supplementary material for: Enhanced visible light-mediated photocatalysis, antibacterial functions and fabrication of a 3-chlorophenol sensor based on ternary Ag2O·SrO·CaO
Source: Royal Society of Chemistry journal article supplement (doi:10.1039/d0ra01205j), 2020-01-01
Supplement: d0ra01205j1.pdf [file d0ra01205j1.pdf]

## Supplementary materials of Ag<sub>2</sub>O•SrO•CaO

Table S1. EDS data of Ag<sub>2</sub>O•SrO•CaO

| Element | Weight % | Atomic % |
|---------|----------|----------|
| O K     | 50.98    | 79.90    |
| Ca K    | 18.24    | 11.41    |
| Sr L    | 28.51    | 8.16     |
| Ag L    | 2.26     | 0.53     |

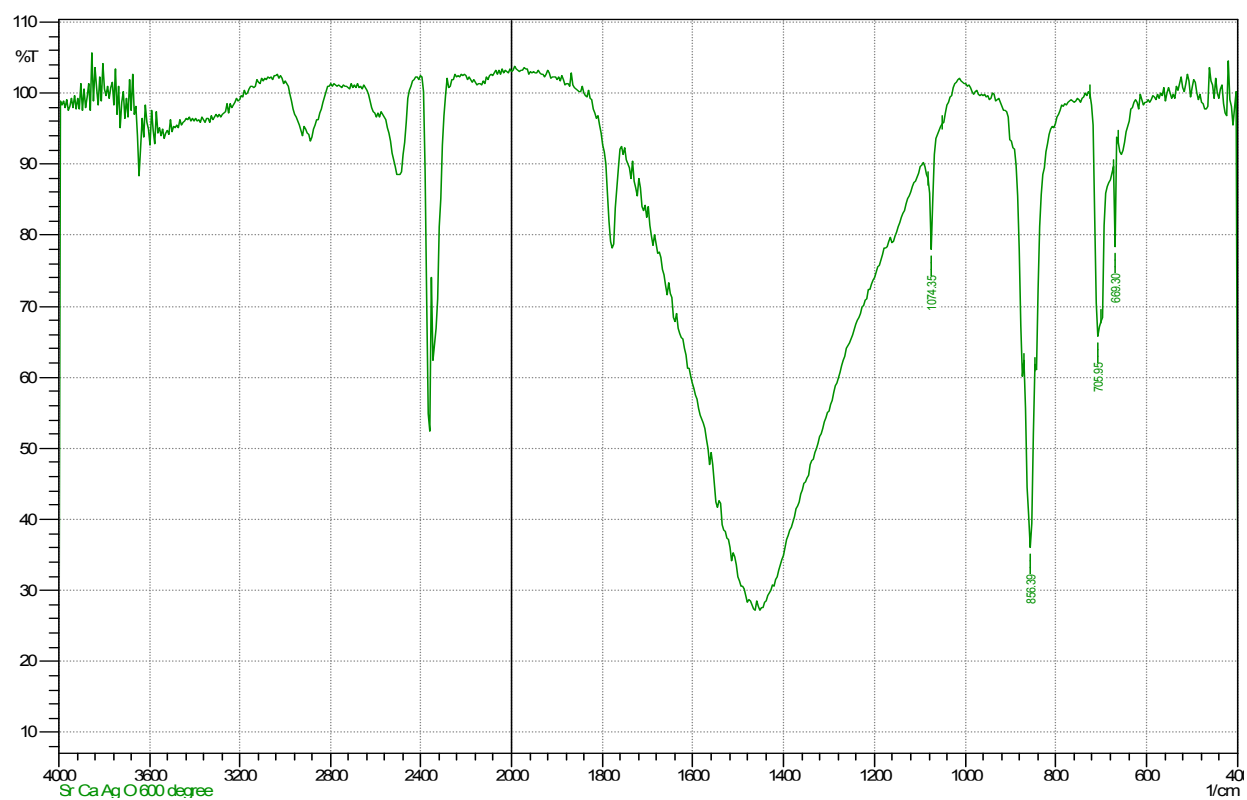

Figure S1: The FTIR spectrum of Ag<sub>2</sub>O•SrO•CaO nanocomposite calcined at 600 °C

Table S2: Excitation wavelength dependent emissions of Ag<sub>2</sub>O•SrO•CaO nanocomposite calcined at 600 °C

| Excitation wavelength (nm) | Emissions observed (nm) |
|----------------------------|-------------------------|
|----------------------------|-------------------------|

|     |          |
|-----|----------|
| 294 | 368, 462 |
| 300 | 369, 476 |
| 330 | 372, 410 |
| 350 | 384, 430 |

**Table S3:** Monitored wavelength dependent excitations of  $\text{Ag}_2\text{O}\cdot\text{SrO}\cdot\text{CaO}$  nanocomposite calcined at 600 °C

| Excitation wavelength (nm) | Emissions observed (nm) |
|----------------------------|-------------------------|
| 380                        | 333                     |
| 450                        | 331, 352                |
| 480                        | 350, 421                |
| 500                        | 345, 435, 459           |

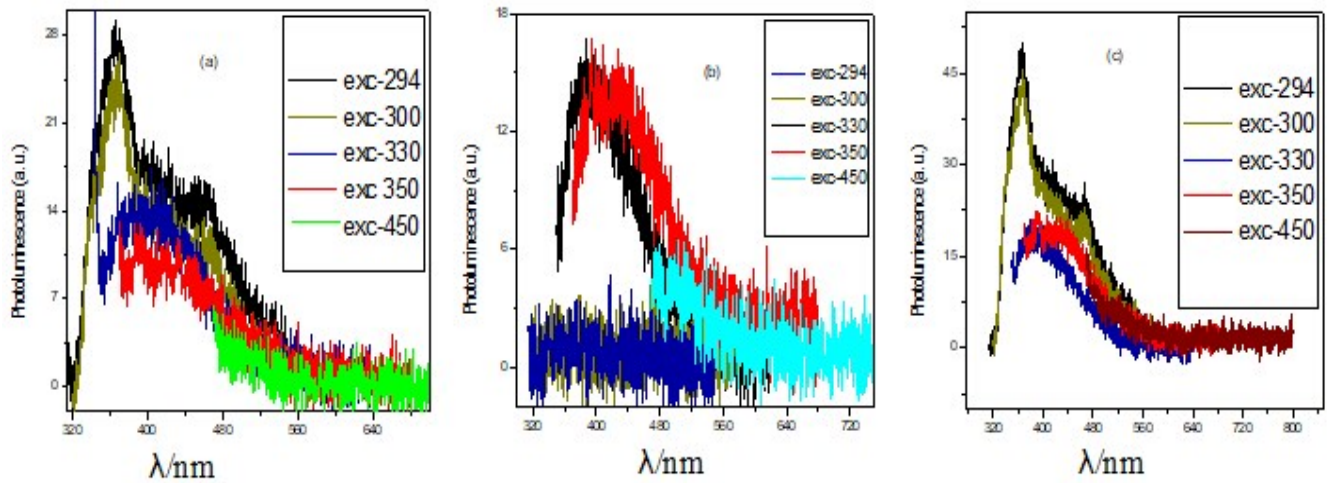

**Figure S2:** PL spectra of single metal oxide nanocomposites heated at 600 °C at various wavelengths of excitations (a)SrO, (b)  $\text{Ag}_2\text{O}$  and (c) CaO

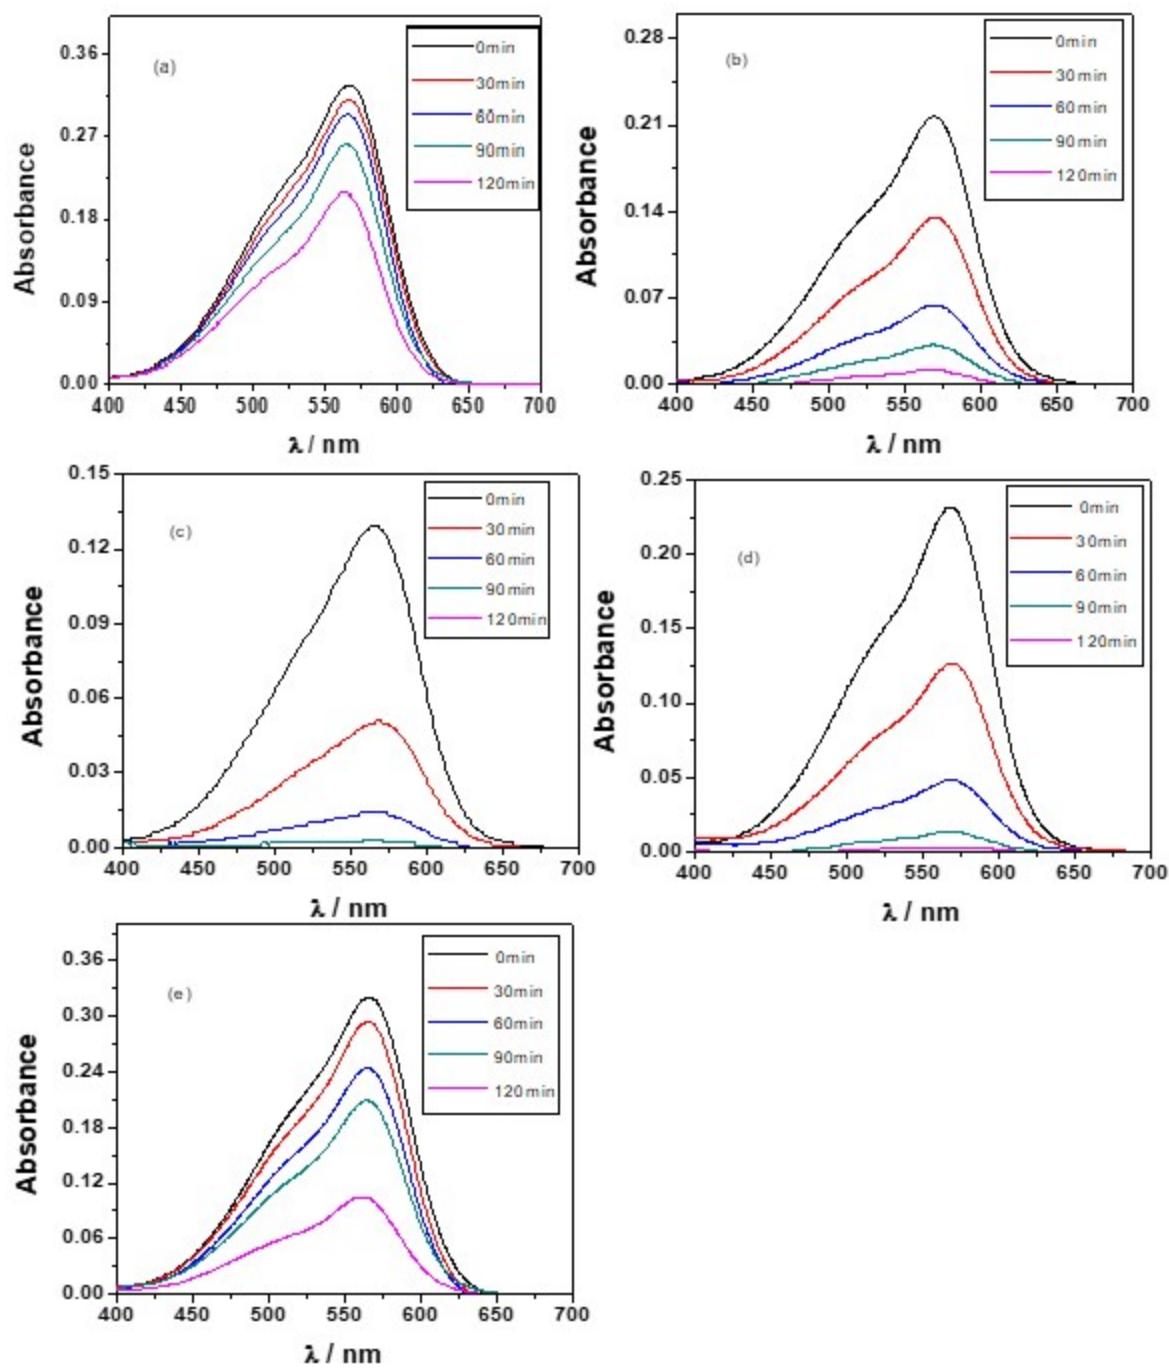

**Figure S3:** Determination of optimum photocatalyst amount on degradation rate constants of MV dye under visible light: (a) 0.03 gL<sup>-1</sup>, (b) 0.04 gL<sup>-1</sup>, (c) 0.05 gL<sup>-1</sup>, (d) 0.06 gL<sup>-1</sup>, (e) 0.07 gL<sup>-1</sup> degradation of MV (MV concentration: 0.0393 gL<sup>-1</sup>, pH 9, irradiation time 150min);

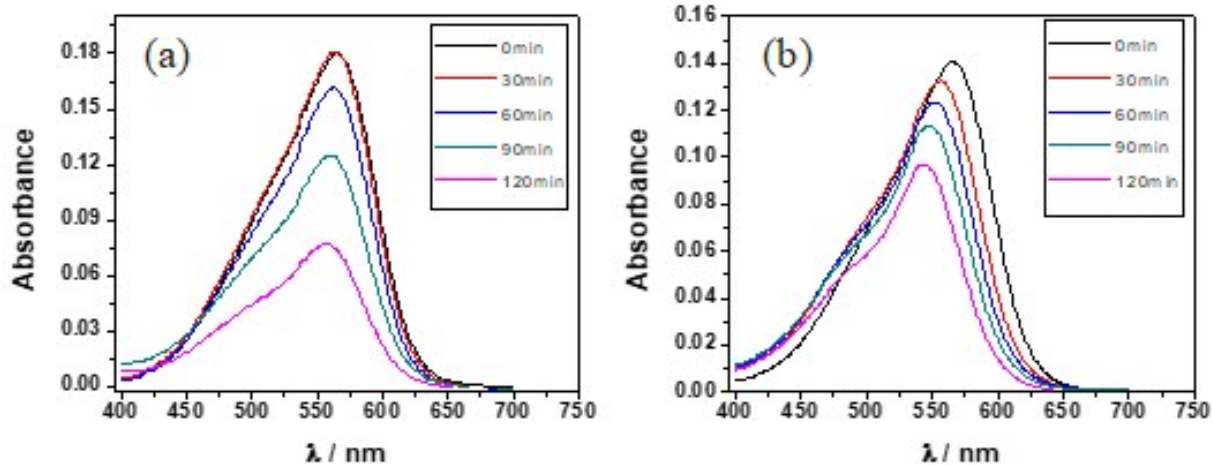

Figure S4: Variation in the absorption spectra of the photocatalytic degradation of MV dye in the presence of  $\text{Ag}_2\text{O}\cdot\text{SrO}\cdot\text{CaO}$  catalyst under visible light irradiation for 120 minutes with 30 minutes time intervals: (a) at pH 7 and (b) at pH 4 (MV concentration:  $0.0393 \text{ gL}^{-1}$ , catalyst dosages:  $0.05 \text{ gL}^{-1}$ )

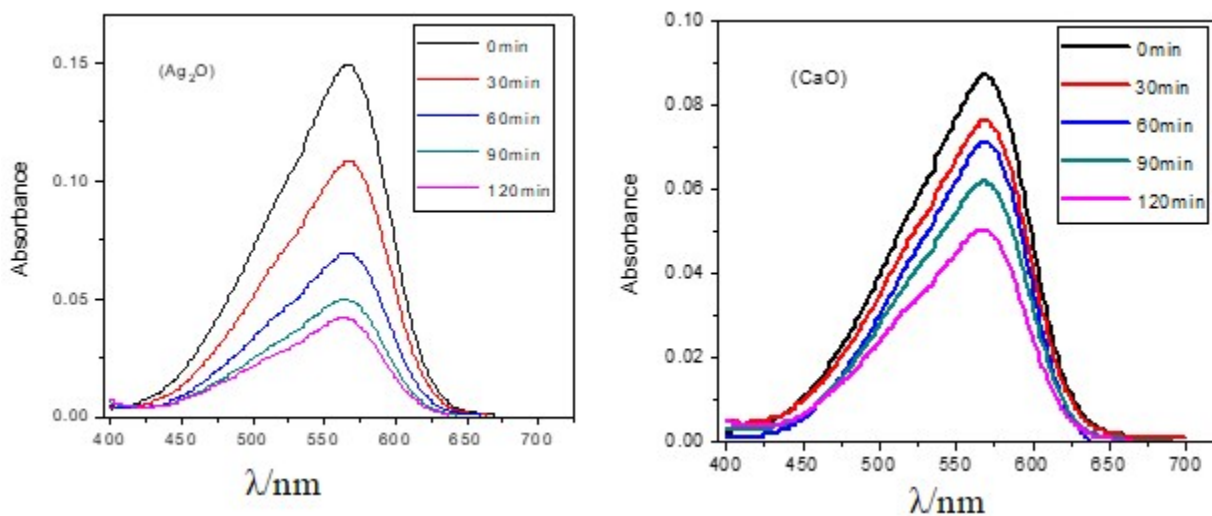

Figure S5: Photocatalytic degradation of MV dye at pH 9 under visible light irradiation for 120 minutes with 30 minutes time intervals in the presence of (a)  $\text{Ag}_2\text{O}$  catalyst, (b)  $\text{CaO}$  catalyst.

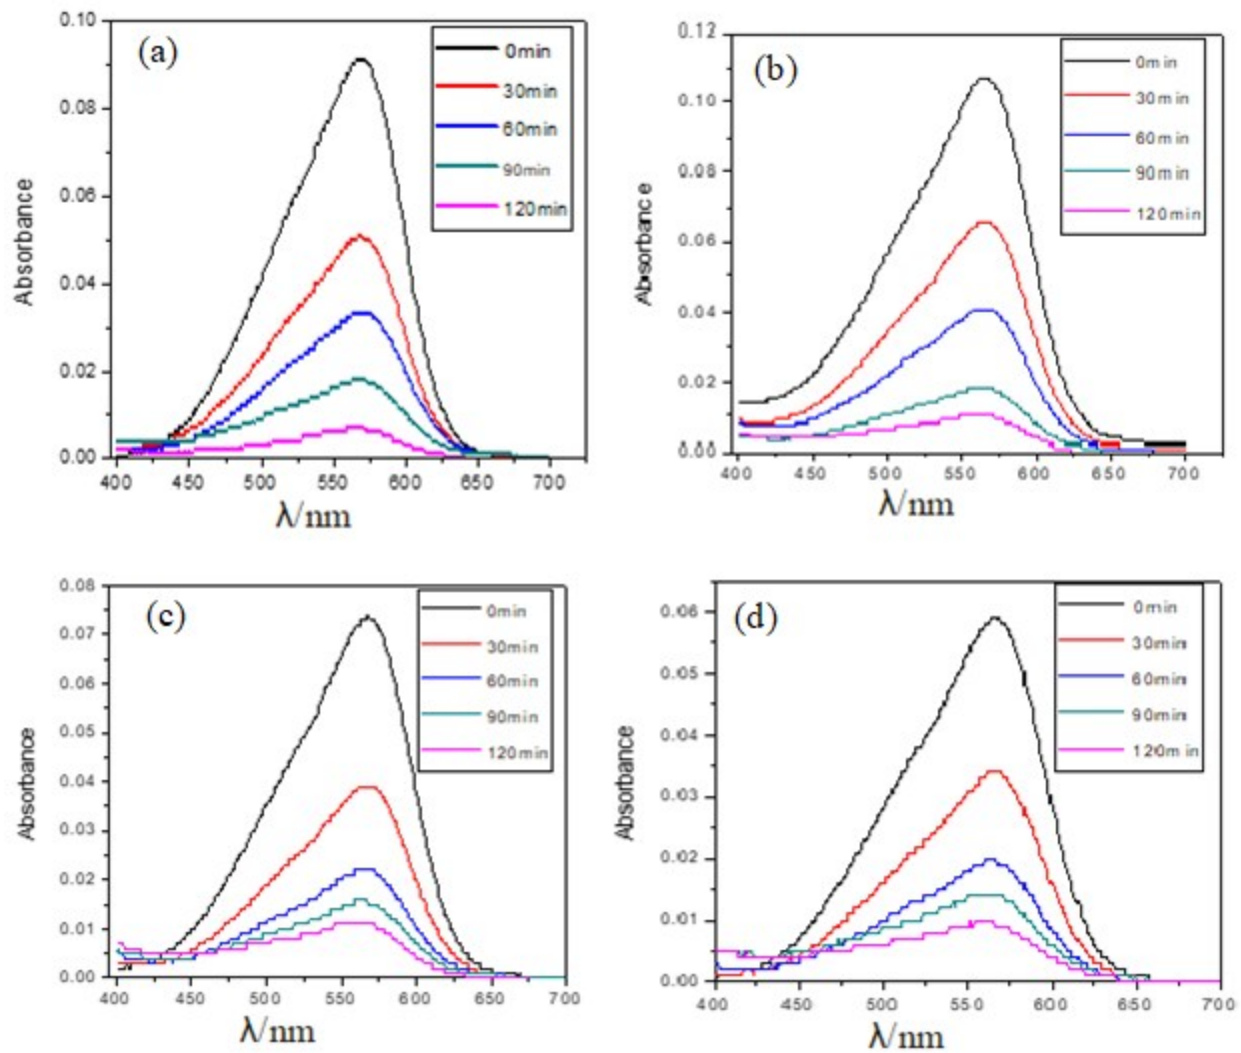

**Figure S6:** Recycle and reuse of  $\text{Ag}_2\text{O}\cdot\text{SrO}\cdot\text{CaO}$  photocatalyst for MV dye degradation (MV concentration:  $0.0393 \text{ gL}^{-1}$ ; photocatalyst dosage:  $0.05 \text{ gL}^{-1}$  in the presence of catalyst at pH 9 (a-d) decrease in absorption from 2nd to 5<sup>th</sup> cycle.
